# Supplementary material
Source: Research Square preprint supplement (doi:10.21203/rs.3.rs-9505749/v1)
Supplement: Supplementary file 1 [file 793ece6ba3227e949e5136ac.docx]

**Table S1.** Sequences of circPUM1(2), circPUM1(2-3) and the mutants used in this study

| Name | Sequences (5’ to 3’) |
| --- | --- |
| circPUM1(2) | CTGAAACATCACCCTCAAGAACCAGCTAATCCCAACATGCCTGTTGTTTTGACATCTGGAACAGGGTCGCAAGCGCAGCCACAACCAGCTGCAAATCAGGCTCTTGCAGCTGGGACTCACTCCAGCCCTGTCCCAGGATCTATAGGAGTTGCAGGCCGTTCCCAGGACGACGCTATGGTGGACTACTTCTTTCAGAGGCAGCATGGTGAGCAGCTTGGGGGAGGAGGAAGTGGAGGAGGCGGCTATAATAATAGCAAACATCGATGGCCTACTGGGGATAACATTCATGCAGAACATCAGGTGTTGGTGGAATGAGCGTTGCATGTGTCTTGAAGAGAAAAGCAGTGCTTTGGCAGGACTCTTTCAGCCCCCAC |
| circPUM1(2-3) | AGCAGTGCTTTGGCAGGACTCTTTCAGCCCCCACCTGAAACATCACCCTCAAGAACCAGCTAATCCCAACATGCCTGTTGTTTTGACATCTGGAACAGGGTCGCAAGCGCAGCCACAACCAGCTGCAAATCAGGCTCTTGCAGCTGGGACTCACTCCAGCCCTGTCCCAGGATCTATAGGAGTTGCAGGCCGTTCCCAGGACGACGCTATGGTGGACTACTTCTTTCAGAGGCAGCATGGTGAGCAGCTTGGGGGAGGAGGAAGTGGAGGAGGCGGCTATAATAATAGCAAACATCGATGGCCTACTGGGGATAACATTCATGCAGAACATCAGGTGCGTTCCATGGATGAACTGAATCATGATTTTCAAGCACTTGCTCTGGAGGGAAGAGCGATGGGAGAGGTGTTGGTGGAATGAGCGTTGCATGTGTCTTGAAGAGAAA |
| circPUM1(2-3)-Mut | GTGTTGGTGGAATGAGCGTTGCATGTGTCTTGAAGAGAAAAGCAGTGCTTTGGCAGGACTCTTTCAGCCCCCACCTGAAACATCACCCTCAAGAACCAGCTAATCCCAACATGCCTGTTGTTTTGACATCTGGAACAGGGTCGCAAGCGCAGCCACAACCAGCTGCAAATCAGGCTCTTGCAGCTGGGACTCACTCCAGCCCTGTCCCAGGATCTATAGGAGTTGCAGGCCGTTCCCAGGACGACGCTATGGTGGACTACTTCTTTCAGAGGCAGCATGGTGAGCAGCTTGGGGGAGGAGGAAGTGGAGGAGGCGGCTATAATAATAGCAAACATCGATGGCCTACTGGGGATAACATTCATGCAGAACATCAGGTGCGTTCCATGGACGAACTGAATCATGATTTTCAAGCACTTGCTCTGGAGGGAAGAGCGATGGGAGAG |
| PSMA6-Mut-UTR | GGAAGCAGTCGCTGCAACTTCCGGGAGGTGCTTGTGTGCCTGGTGCGGGAGCTACGGGGCCCAGGGATTGTGTTTAAAGTAGTGCTTCTACCAACATGTCCCGTGGTTCCAGCGCCGGTTTTGACCGCCACATTACCATTTTTTCACCCGAGGGTCGGCTCTACCAAGTAGAATATGCTTTTAAGGCTATTAACCAGGGTGGCCTTACATCAGTAGCTGTCAGAGGGAAAGACTGTGCAGTAATTGTCACACAGAAGAAAGTACCTGACAAATTATTGGATTCCAGCACAGTGACTCACTTATTCAAGATAACTGAAAACATTGGTTGTGTGATGACCGGAATGACAGCTGACAGCAGATCCCAGGTACAGAGGGCACGCTATGAGGCAGCTAACTGGAAATACAAATACGGCTATGAGATTCCTGTGGACATGCTGTGTAAAAGGATCGCCGATATTTCTCAGGTCTACACACAGAATGCTGAAATGAGGCCTCTTGGTTGTTGTATGATTTTAATTGGTATAGATGAAGAGCAAGGCCCTCAGGTATATAAGTGTGATCCTGCAGGTTACTACTGTGGGTTTAAAGCCACTGCAGCGGGAGTTAAACAAACTGAGTCAACCAGCTTCCTTGAAAAAAAAGTGAAGAAGAAATTTGATTGGACATTTGAACAGACAGTGGAAACTGCAATTACATGCCTGTCTACTGTTCTATCAATTGATTTCAAACCTTCAGAAATAGAAGTTGGAGTAGTGACAGTTGAAAATCCTAAATTCAGAATCCTTACAGAAGCAGAGATTGATGCTCACCTTGTTGCTCTAGCAGAGAGAGACTAAACATTGTCGTTAGTTTACCAGATCCGTGATGCCACTTACCTGTGTGTTTGGTAACAACAAACCAACATCATGGAGGTCCCTGGATTGAAAAAGGAGCCTCTCCCACTCCTCCTACCACCGAAGTGGTTAGGACTCTATATAAATAAAAACAAGGCTTTTGGAAAATAATTGCATCCTGTTGTTTTCA |
| PSMA6-Mut-UTR | GGAAGCAGTCGCTGCAACTTCCGGGAGGTGCTTGTGTGCCTGGTGCGGGAGCTACGGGGCCCAGGAATCGTGTTTAAAGTAGTGCTTCTACCAACATGTCCCGTGGTTCCAGCGCCGGTTTTGACCGCCACATTACCATTTTTTCACCCGAGAGTGGGCTCTACCAAGTAGAATATGCTTTTAAGGCTATTAACCAGAGTCGCCTTACATCAGTAGCTGTCAGAGGGAAAGACTGTGCAGTAATTGTCACACAGAAGAAAGTACCTGACAAATTATTGGATTCCAGCACAGTGACTCACTTATTCAAGGTAACTGAAAACATTGGTTGTGTGATGACCGGAATGACAGCTGACAGCAGATCCCAGGTACAGAGGGCACGCTATGAGGCAGCTAACTGGAAATACAAGTATGGCTATGAGATTCCTGTGGACATGCTGTGTAAAAGAATTGCCGATATTTCTCAGGTCTACACACAGAATGCTGAAATGAGGCCTCTTGGTTGTTGTATGATTTTAATTGGTATAGATGAAGAGCAAGGCCCTCAGGTATATAAGTGTGATCCTGCAGGTTACTACTGTGGGTTTAAAGCCACTGCAGCGGGAGTTAAACAAACTGAGTCAACCAGCTTCCTTGAAAAAAAAGTGAAGAAGAAATTTGATTGGACATTTGAACAGACAGTGGAAACTGCAATTACATGCCTGTCTACTGTTCTATCAATTGATTTCAAACCTTCAGAAATAGAAGTTGGAGTAGTGACAGTTGAAAATCCTAAATTCAGGATTCTTACAGAAGCAGAGATTGATGCTCACCTTGTTGCTCTAGCAGAGAGAGACTAAACATTGTCGTTAGTTTACCAGATCCGTGATGCCACTTACCTGTGTGTTTGGTAACAACAAACCAACATCATGGAGGTCCCTGGGCTTAAAAAGGAGCCTCTCCCACTCCTCCTACCACCGAAGTGGTTAGGACTCTATATAAATAAAAACAAGGCTTTTGGAAAATAATTGCATCCTGTTGTTTTCA |

**Table S2.** Sequences of primers and probes used in this study

|  | Sequences (5’ to 3’) |
| --- | --- |
| **Probes** | |
| circPUM1(2) FISH probe | TAATACGACTCACTATAGGGGAACCAGCTAATCCCAACATGC |
| circPUM1(2-3) FISH probe | TAATACGACTCACTATAGGGAGTGCTTTGGCAGGACTCTT |
| circPUM1(2) pulldown probe | CTCATTCCACCAACACCTGATGTTCTGCATG |
| circPUM1(2-3) pulldown probe | CTCATTCCACCAACACCTCTCCCATCGCTC |
| **Primers** | |
| circPUM1(2) | AACATCAGGTGTTGGTGGA |
| AACAGGCATGTTGGGATTAG |
| circPUM1(2-3) | CGATGGGAGAGGTGTTGGT |
| CATGTTGGGATTAGCTGGTTCT |
| GAPDH mRNA | GCAGGAATTCTTCCTATGTTCATGG |
| CTACTCCATCACTCAAGGTTGC |
| β-actin mRNA | GAAGGTGACAGCAGTCGGTT |
| CCTCGGCCACATTGTGAACT |
| U1 | GATACCATGATCACGAAGGTG |
| CTACCACAAATTATGCAGTCG |
| G3BP2 mRNA | GCAGGAATTCTTCCTATGTTCATGG |
| CTACTCCATCACTCAAGGTTGC |
| PUM1 mRNA | TCCTTCAGACCAGCAGGTAA |
| TGGATAAGGCAAATACCTGTCCC |
| PSMA6 mRNA | TGCTTCTACCAACATGTCCCG |
| CATGACAGGGCAATTCAGGTG |
| PUM1mRNA exon 3 | TCAGAGGCAGCATGGTGA |
| AGGTCTTCTCTGCACCATG |
| IVT circPUM1(2) | ATTCAGGCTGCGCAACTGTT |
| ATTATTATAGCCGCCTCCTCCAC |
| IVT circPUM1(2-3) | ATTCAGGCTGCGCAACTGTT |
| AGTGAGTCCCAGCTGCAAG |

**Table S3.** Sequences of siRNA used in this study

| Name | Sequences (5’ to 3’) |
| --- | --- |
| si-circPUM1(2)-1 | UCAUGCAGAACAUCAGAGATT |
| UCUCUGAUGUUCUGCAUGATT |
| si-circPUM1(2)-2 | AUGCAGAACAUCAGAGAAGTT |
| CUUCUCUGAUGUUCUGCAUTT |
| si-circPUM1(2-3)-1 | CAGAACAUCAGGUGCGUUCTT |
| GAACGCACCUGAUGUUCUGTT |
| si-circPUM1(2-3)-2 | CAUGCAGAACAUCAGGUGCGTT |
| CGCACCUGAUGUUCUGCAUGTT |
| si-PSMA6-1 | AGACCUGAGAAAUAUCGGC |
| UCUGGACUCUUUAUAGCCG |
| si-PSMA6-2 | GGUAAACUAACGACAAUG |
| CCAUUUGAUUGCUGUUAC |
| si-G3BP2-1 | CUCUGAACCAGUUCAGAGA |
| GAGCUAAAGGAAUUCUUCA |
| si-G3BP2-2 | GGAAGAAUCCUCUCAUGAATT |
| CCGAGUGGCUCCUGAAUUUTT |

**Table S4.** Antibodies used in this study

| Antigens | Catalog Number | Manufacturer | Application |
| --- | --- | --- | --- |
| Anti-PSMA6 antibody | 11573-1-AP | Proteintech | WB, IHC |
| Anti-G3BP2 antibody | 16276-1-AP | Proteintech | WB, IF, RIP, IHC |
| Rabbit IgG | 30000-0-AP | Proteintech | WB, RIP |
| HRP-conjugated Goat Anti-Rabbit IgG | SA00001-2 | Proteintech | WB |
| HRP-conjugated Goat Anti-Mouse IgG | SA00001-1 | Proteintech | WB |
| MEK1/2 | 11049-1-AP | Proteintech | WB, IHC |
| p-MEK1/2 | 9121S | Cell Signaling Technology | WB |
| p-ERK1/2 | 28733-1-AP | Proteintech | WB |
| ERK1/2 | 11257-1-AP | Proteintech | WB |
| Ki-67 | ab16667 | Abcam | IHC |
| Cleaved-Caspase 3 | AF7022 | Affinity | IHC |
| p-ERK1/2 | AF1015 | Affinity | IHC |
| ERK1 | 66192-1-AP | Proteintech | IHC |
| p-MEK1 | R013169 | EpiZyme | IHC |
| EGFR | 18986-1-AP | Proteintech | WB |
| p-EGFR | ET1612-30 | HUABIO | WB |
